# Supplementary material
Source: Research Square preprint supplement (doi:10.21203/rs.3.rs-9093813/v1)
Supplement: Supplementary file 1 [file a1232e66f1955242a7259d20.docx]

Supplementary Table S1. Metabolite differences by untargeted NMR bucket (RA vs T2DM)

| Category | Metabolite | Direction  (RA vs T2DM) | Fold changes | FDR adjusted p value |
| --- | --- | --- | --- | --- |
| Amino acids | Alanine | ↓ | 0.796 | 1.657E-06 |
|  | Glutamate | ↓ | 0.822 | 1.913E-04 |
|  | Valine | ↓ | 0.781 | 1.155E-05 |
|  | Isoleucine | ↓ | 0.742 | 1.657E-06 |
|  | Histidine | ↓ | 0.894 | 1.379E-04 |
|  | Asparagine | ↓ | 0.936 | 5.924E-03 |
|  | Phenylalanine | ↑ | 1.168 | 3.432E-03 |
| Amino acid derivatives | 4-Hydroxyphenylacetate | ↑ | 1.097 | 1.648E-02 |
|  | 2-Ketoisovalerate | ↓ | 0.908 | 5.924E-03 |
|  | 3-Hydroxyisobutyrate | ↓ | 0.850 | 1.764E-05 |
| Carbohydrate/energy | α-Glucose | ↓ | 0.738 | 1.764E-05 |
|  | β-Glucose | ↓ | 0.776 | 5.332E-05 |
|  | Acetoacetate | ↓ | 0.793 | 3.417E-02 |

Note: Direction is RA relative to T2DM (reference=T2DM). ↓: downregulated; ↑: upregulated.

Supplementary Table S2. Correlations between lipoprotein subclasses and vascular measurements in T2DM

| Lipoprotein | Vascular marker | R (spearman) | p-value |
| --- | --- | --- | --- |
| HDL subclass | | | |
| HDL-TG  HDL-4-TG  HDL-4-TG  HDL-4-TG  HDL-4-TG | PWV  PWV  Average CIMT  Maximum CIMT  Plaque | -0.44  -0.57  -0.45  -0.43  -0.40 | 0.018  0.001  0.014  0.019  0.034 |
| LDL subclass | | | |
| LDL-6-Chol  LDL-6-Free Chol | FMD | -0.37  -0.40 | 0.046  0.034 |

Supplementary Table S3. Correlations between lipoprotein subclasses and vascular measurements in RA

| Lipoprotein | | Vascular marker | | R (spearman) | | p-value |
| --- | --- | --- | --- | --- | --- | --- |
| LDL subclass | | | | | | |
| LDL-1 PN  LDL-2-TG  LDL-1-Free Chol  LDL-1-Apo B100 | FMD | | -0.37  -0.37  -0.39  -0.37 | | 0.047  0.046  0.036  0.047 | |
| HDL subclass | | | | | | |
| HDL-2-Free Chol  HDL-2-Apo A2  HDL-3-Free Chol HDL-3-Phospholipid HDL-3-Apo A1 | FMD | | -0.39  -0.43  -0.39  -0.40  -0.44 | | 0.037  0.021  0.036  0.032  0.016 | |
| LDL subclass | | | | | | |
| LDL PN  LDL-Apo B100  LDL-3-TG  LDL-5 PN  LDL-5-Chol  LDL-5-Free Chol  LDL-5-Phospholipid  LDL-5-Apo B100 | | PWV | | 0.38  0.38  0.45  0.42  0.41  0.40  0.42  0.42 | | 0.045  0.045  0.014  0.023  0.029  0.029  0.024  0.022 |
| LDL subclass | | | | | | |
| *LDL PN  *LDL-ApoB 100  *LDL-4 PN  *LDL-4-ApoB100  *LDL-4-Chol  *LDL-4-Free Chol  #LDL-4-Free Chol  *LDL-4-Phospholipid  *LDL-5 PN  *LDL-5-ApoB100  *LDL-5-Chol  *LDL-5-Free Chol  #LDL-5-Free Chol  *LDL-5-TG  *LDL-5-Phospholipid  *LDL-6-Phospholipid  #LDL-6-Phospholipid  #LDL-6 PN  #LDL-6-Chol  #LDL-6-Apo B100 | | CIMT | | 0.42  0.38  0.37  0.37  0.45  0.46  0.38  0.45  0.48  0.48  0.45  0.48  0.39  0.49  0.46  0.38  0.43  0.37  0.37  0.38 | | 0.025  0.045  0.049  0.049  0.013  0.012  0.040  0.014  0.008  0.008  0.015  0.008  0.036  0.007  0.012  0.042  0.019  0.044  0.047  0.044 |

*Correlates with average CIMT

#Correlates with maximum CIMT

Supplementary Table S4. Correlations between metabolites and vascular measurements in T2DM

| Metabolite | Vascular marker | R (spearman) | p-value |
| --- | --- | --- | --- |
| 2-Ketoisovalerate | FMD | −0.14 | 0.475 |
| Methanol | FMD | 0 | 0.999 |
| Alanine | PWV | −0.09 | 0.649 |
| α-Glucose | PWV | 0.05 | 0.784 |
| Glutamate | PWV | 0.11 | 0.571 |
| Methanol | PWV | −0.42 | 0.022 |
| Alanine | Average CIMT | −0.39 | 0.035 |
| β-Glucose | Average CIMT | 0.01 | 0.942 |
| 4-Hydroxyphenylacetate | Average CIMT | 0.27 | 0.157 |
| Phenylalanine | Plaque | 0.51 | 0.005 |

Supplementary Table S5. Correlations between metabolites and vascular measurements in RA

| Metabolite | Vascular marker | R (spearman) | p-value |
| --- | --- | --- | --- |
| 2-Ketoisovalerate | FMD | −0.49 | 0.007 |
| Methanol | FMD | −0.37 | 0.048 |
| Alanine | PWV | 0.38 | 0.044 |
| α-Glucose | PWV | 0.38 | 0.043 |
| Glutamate | PWV | 0.38 | 0.042 |
| Methanol | PWV | −0.37 | 0.048 |
| Alanine | Average CIMT | 0.38 | 0.044 |
| β-Glucose | Average CIMT | 0.37 | 0.049 |
| 4-Hydroxyphenylacetate | Average CIMT | 0.41 | 0.029 |
| Phenylalanine | Plaque | 0.06 | 0.748 |

Abbreviations:

RA, rheumatoid arthritis; T2DM, type 2 diabetes mellitus; FDR, False Discovery Rate; FMD, flow-mediated dilation; PWV, carotid–femoral pulse wave velocity; CIMT, carotid intima–media thickness; TG, triglyceride; Chol, cholesterol; HDL, high-density lipoprotein; LDL, low-density lipoprotein; PN, particle number; ApoB-100, apolipoprotein B-100; ApoA-1, apolipoprotein A-1; ApoA-2, apolipoprotein A-2. n=29 each group.
